# Supplementary material
Source: ML conference proceedings conference paper supplement (https://aclanthology.org/P19-1484)
Supplement: Supplementary [file P19-1484.Supplementary.zip]

|                     | Who | What | When | How | Where |
|---------------------|-----|------|------|-----|-------|
| PERSON/<br>ORG/NORP | 74% | 0%   | 19%  | 6%  | 0%    |
| THING               | 2%  | 92%  | 6%   | 1%  | 0%    |
| TEMPORAL            | 6%  | 0%   | 76%  | 14% | 3%    |
| NUMERIC             | 1%  | 3%   | 9%   | 71% | 16%   |
| PLACE               | 0%  | 3%   | 1%   | 14% | 82%   |
