# Supplementary material
Source: ML conference proceedings conference paper supplement (https://aclanthology.org/P19-1484)

Context  $c$

The London Sevens is a rugby tournament held at Twickenham Stadium in London. It is part of the World Rugby Sevens Series. For many years the London Sevens was the last tournament of each season but the Paris Sevens became the last stop on the calendar in 2018.

Answer Extraction

Answer  
 $a$

2018

Question  
Generation

Cloze Generation

the Paris sevens become  
the last stop on the  
calendar in MASK

Cloze Translation

Cloze  
Question  
 $q'$

Question  
Answering

QA Model

Natural  
Question  $q$

When did the Paris Sevens become the last stop on the calendar?

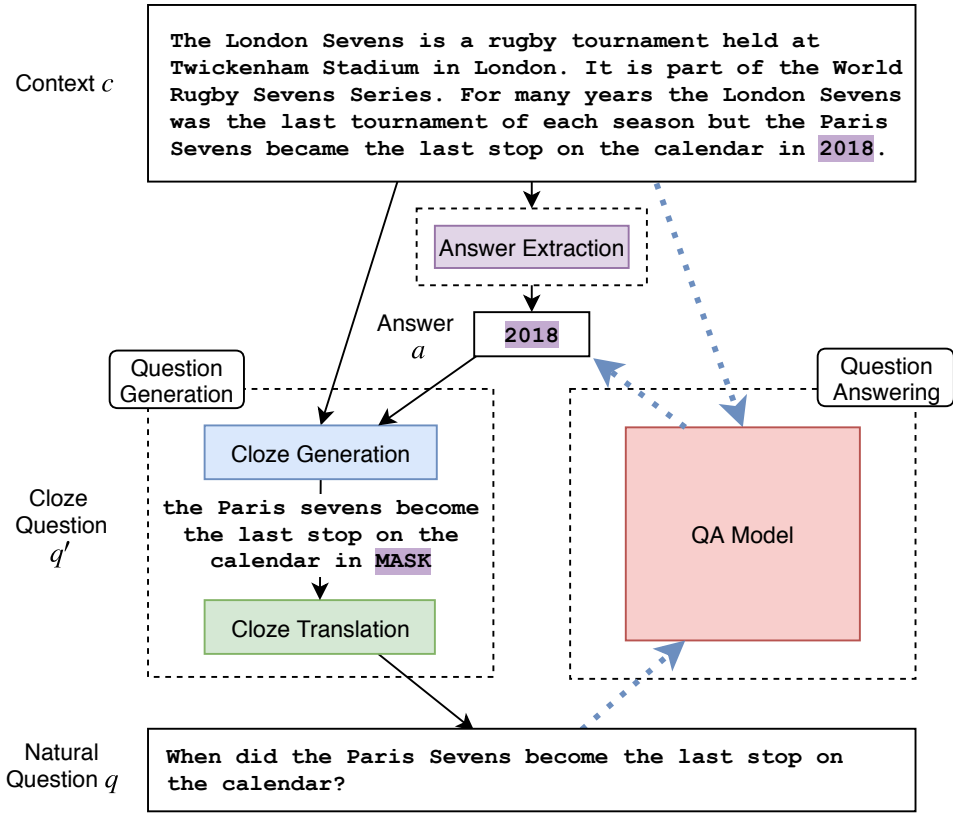

Supplement: Supplementary [file P19-1484.Supplementary.zip]
