# Supplementary material
Source: ML conference proceedings conference paper supplement (https://aclanthology.org/P19-1484)

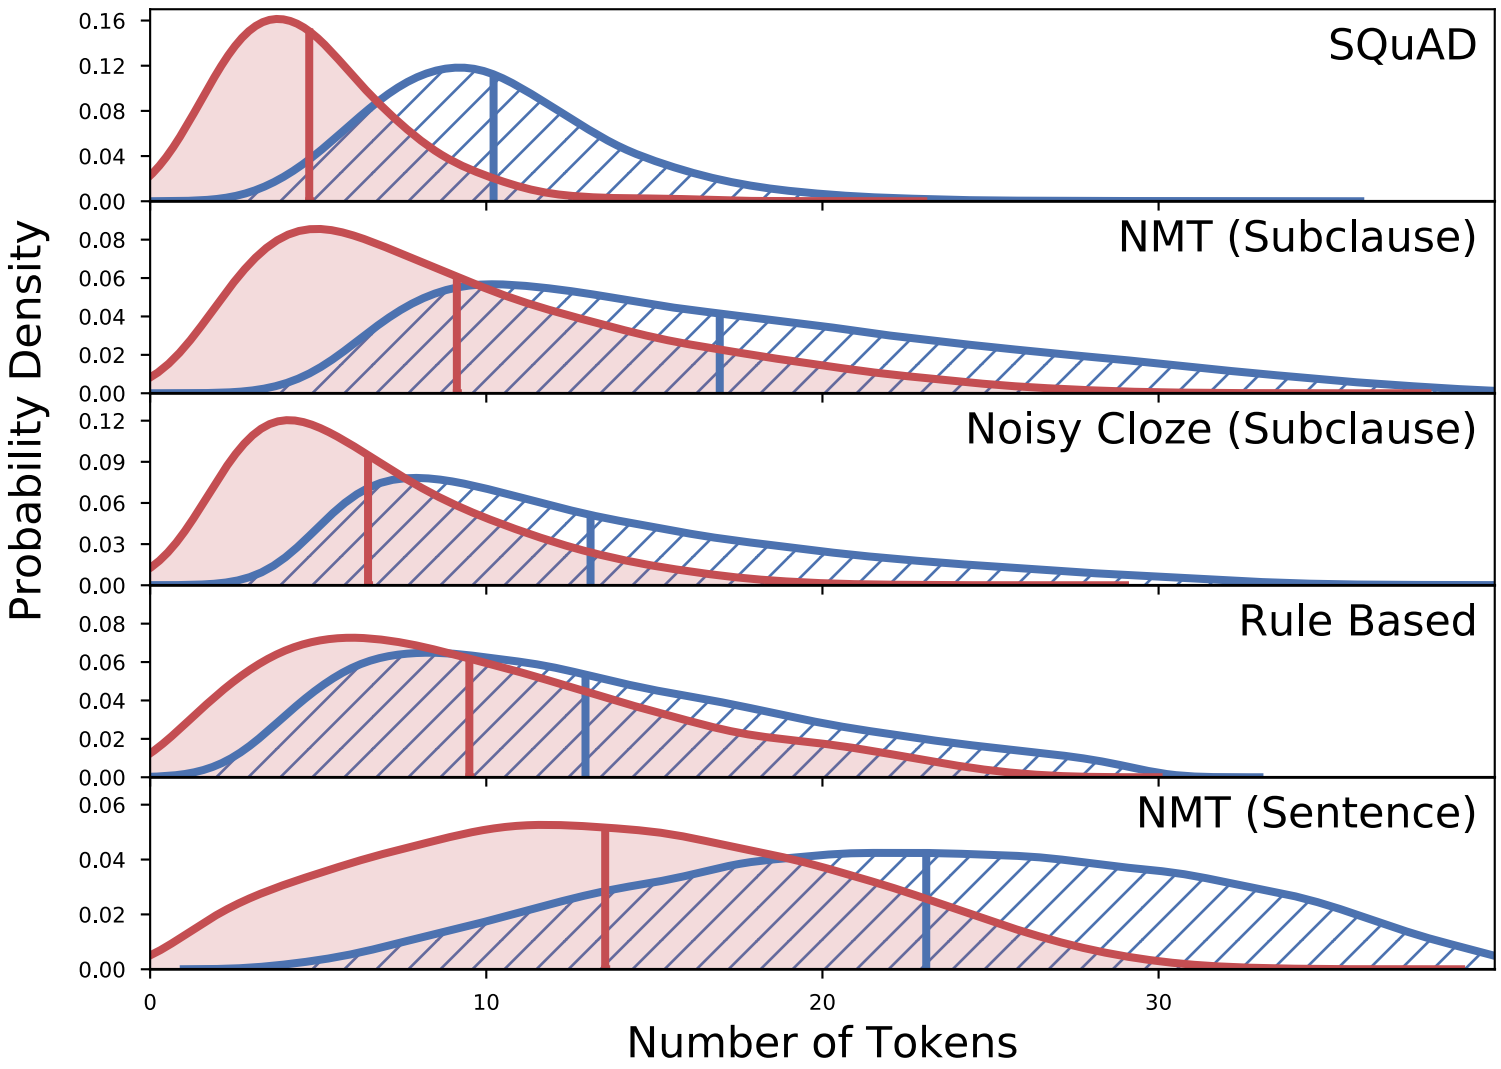

Supplement: Supplementary [file P19-1484.Supplementary.zip]

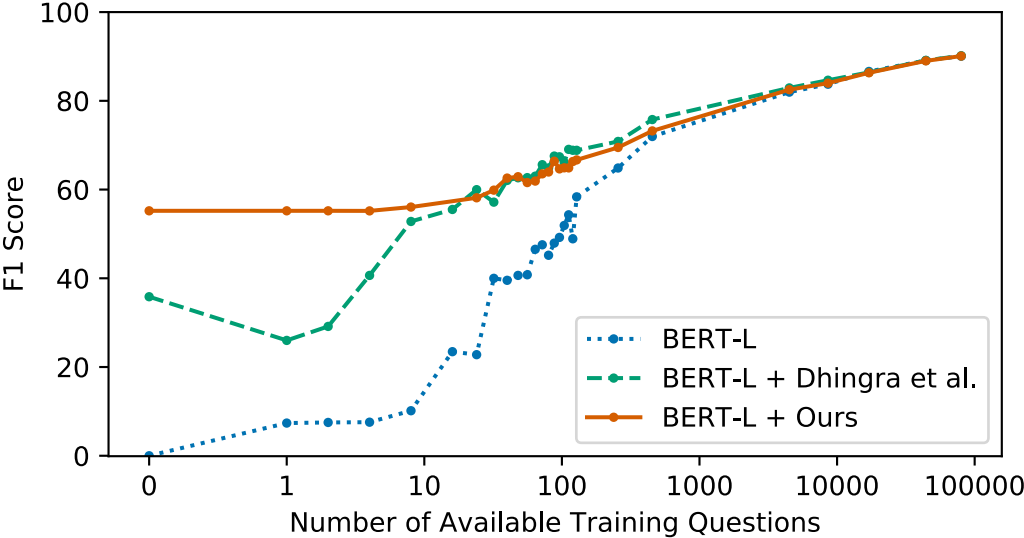

Supplement: Supplementary [file P19-1484.Supplementary.zip]

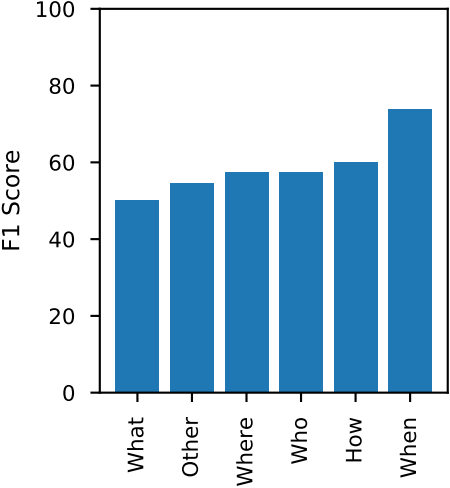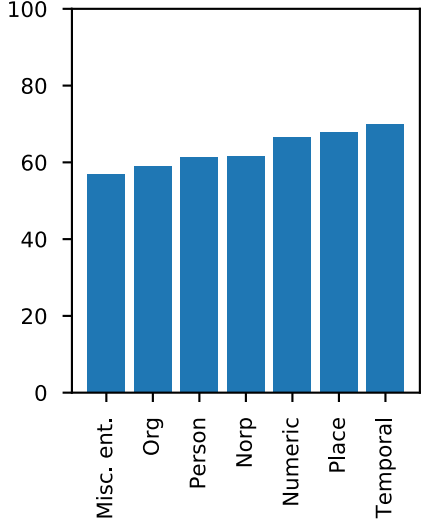

Supplement: Supplementary [file P19-1484.Supplementary.zip]

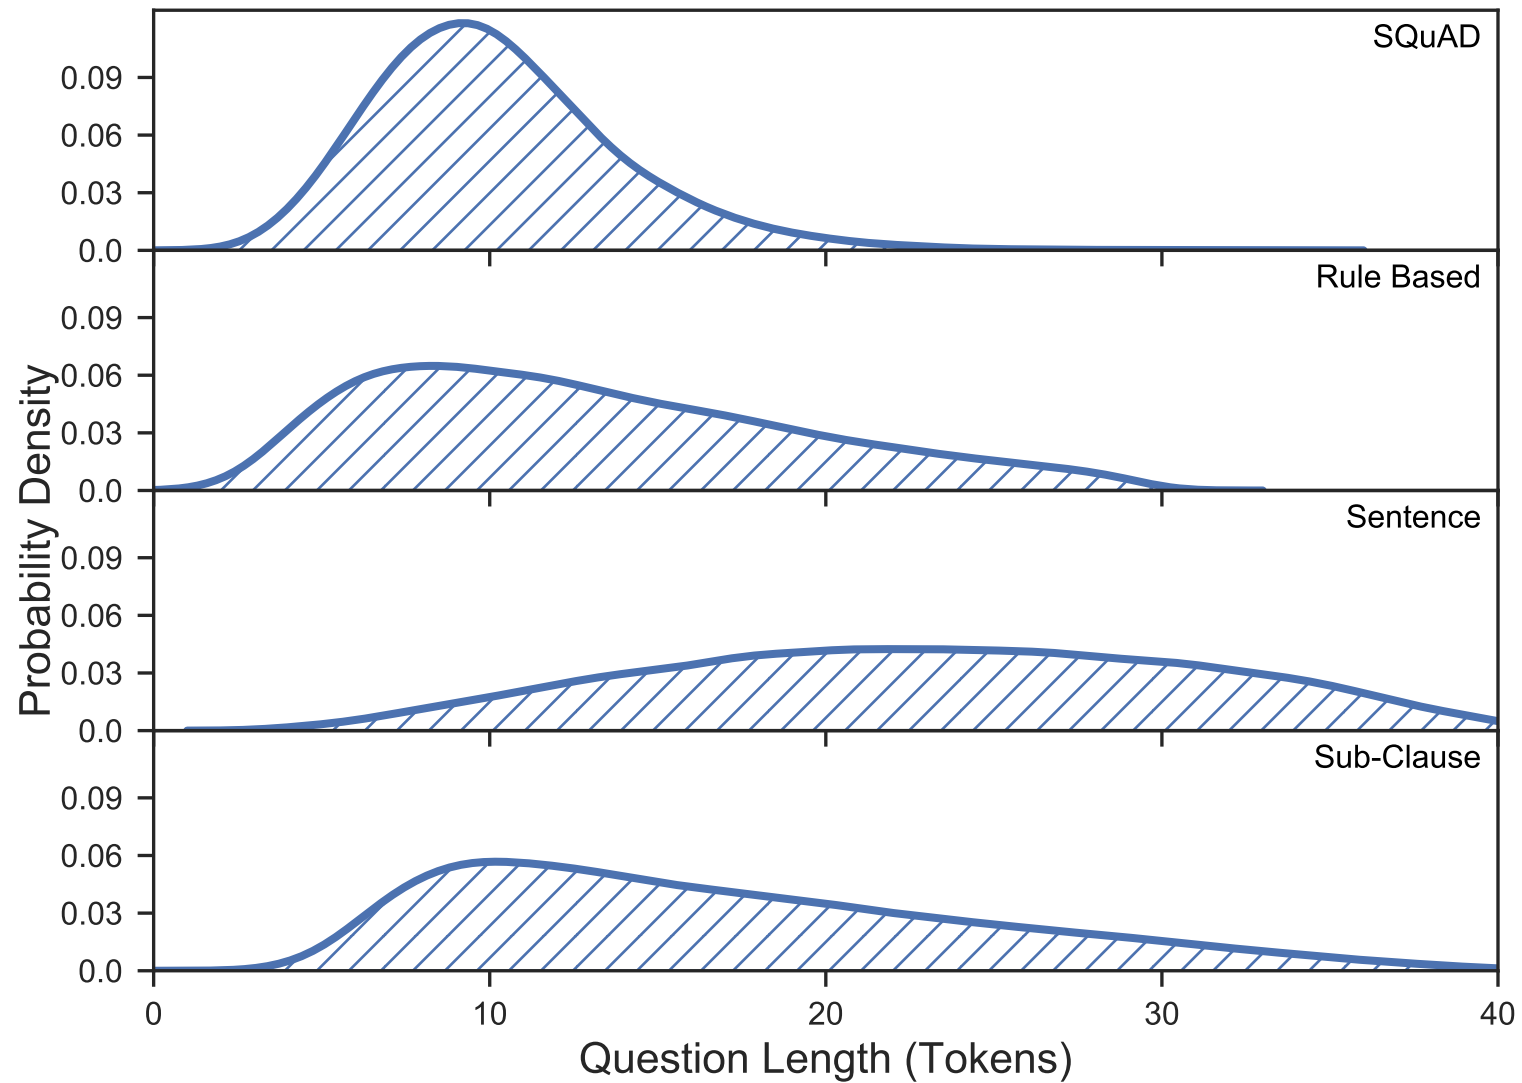

Supplement: Supplementary [file P19-1484.Supplementary.zip]
